# Supplementary material for: Association of predicted fat mass, predicted lean mass and predicted percent fat with diabetes mellitus in Chinese population: a 15-year prospective cohort
Source: HighWire-hosted journal article supplement (doi:10.1136/bmjopen-2021-058162), 2022-06-01

## Supplemental Materials

Table S1: Spearman correlations among different predicted body composition parameters

Table S2: Category boundaries of all the body composition parameters

Table S3: Univariable Cox regression analysis for DM

Table S4: Multivariable Cox regression analysis of commonly used obesity indicators for DM

Figure S1: Associations of three novel predicted body composition with risk of DM for men

Figure S2: Associations of three novel predicted body composition with risk of DM for women

Table S1 Spearman correlations among different predicted body composition parameters

|       | WC   | HC   | WHR  | BMI  | FM   | LM   | PF   |
|-------|------|------|------|------|------|------|------|
| Men   |      |      |      |      |      |      |      |
| WC    | 1.00 | 0.77 | 0.80 | 0.79 | 0.98 | 0.52 | 0.97 |
| HC    |      | 1.00 | 0.28 | 0.76 | 0.82 | 0.71 | 0.69 |
| WHR   |      |      | 1.00 | 0.51 | 0.72 | 0.15 | 0.84 |
| BMI   |      |      |      | 1.00 | 0.88 | 0.69 | 0.75 |
| FM    |      |      |      |      | 1.00 | 0.66 | 0.92 |
| LM    |      |      |      |      |      | 1.00 | 0.35 |
| PF    |      |      |      |      |      |      | 1.00 |
| Women |      |      |      |      |      |      |      |
| WC    | 1.00 | 0.83 | 0.74 | 0.76 | 0.83 | 0.62 | 0.84 |
| HC    |      | 1.00 | 0.28 | 0.79 | 0.87 | 0.74 | 0.78 |
| WHR   |      |      | 1.00 | 0.39 | 0.42 | 0.29 | 0.53 |
| BMI   |      |      |      | 1.00 | 0.94 | 0.63 | 0.95 |
| FM    |      |      |      |      | 1.00 | 0.83 | 0.89 |
| LM    |      |      |      |      |      | 1.00 | 0.51 |
| PF    |      |      |      |      |      |      | 1.00 |

BMI, body mass index; FM, fat mass; HC, hip circumference; LM, lean mass; PF: percent fat; WC, waist circumference; WHR, waist-hip ratio

All correlations were significant with  $p < 0.05$ .

Table S2 Category boundaries of all the body composition parameters

|                          | Men (n = 399)       |                     |                     | Women (n = 288)    |                    |                    |
|--------------------------|---------------------|---------------------|---------------------|--------------------|--------------------|--------------------|
|                          | Tertile 1 (n = 132) | Tertile 2 (n = 131) | Tertile 3 (n = 136) | Tertile 1 (n = 95) | Tertile 2 (n = 95) | Tertile 3 (n = 98) |
| FM (kg)                  | < 11.088            | 11.088 - 15.650     | > 15.650            | < 17.478           | 17.478 - 21.573    | > 21.573           |
| LM (kg)                  | < 46.377            | 46.377 - 50.377     | > 50.377            | < 32.867           | 32.867 - 35.735    | > 35.735           |
| PF (%)                   | < 20.622            | 20.622 - 23.304     | > 23.304            | < 35.402           | 35.402 - 37.630    | > 37.630           |
| BMI (kg/m <sup>2</sup> ) | < 21.800            | 21.800 - 24.500     | > 24.500            | <22.200            | 22.200 - 24.700    | > 24.700           |
| WC (cm)                  | < 75.000            | 75.000 - 82.000     | > 82.000            | < 71.000           | 71.000 -76.000     | > 76.000           |
| HC (cm)                  | < 90.000            | 90.000 - 94.000     | > 94.000            | < 90.000           | 90.000 - 95.000    | > 95.000           |
| WHR                      | < 0.841             | 0.841 - 0.879       | > 0.879             | < 0.773            | 0.773 - 0.814      | > 0.814            |

BMI, body mass index; FM, fat mass; HC, hip circumference; LM, lean mass; PF: percent fat; WC, waist circumference; WHR, waist-hip ratio

Table S3 Univariable Cox regression analysis for DM

| Variable                 | Change            | HR     | 95% CI      | p       |
|--------------------------|-------------------|--------|-------------|---------|
| Men                      |                   |        |             |         |
| Age (years)              | 1-SD increment    | 1.05   | 0.996-1.10  | 0.072   |
| Smoking (%)              | Yes vs no         | 0.79   | 0.44-1.45   | 0.448   |
| Hypertension (%)         | Yes vs no         | 1.36   | 0.66-2.81   | 0.406   |
| DM family history (%)    | Yes vs no         | 0.44   | 0.14-1.40   | 0.163   |
| SBP (mm Hg)              | 1-SD increment    | 1.02   | 0.998-1.036 | 0.076   |
| DBP (mm Hg)              | 1-SD increment    | 1.02   | 0.998-1.052 | 0.234   |
| FPG (mmol/L)             | 1-SD increment    | 1.78   | 1.26-2.52   | 0.001   |
| TC (mmol/l)              | 1-SD increment    | 1.15   | 0.79-1.66   | 0.476   |
| TG (mmol/L)              | 1-SD increment    | 1.16   | 0.91-1.47   | 0.248   |
| HDL-C (mmol/L)           | 1-SD increment    | 0.57   | 1.16-2.00   | 0.376   |
| LDL-C (mmol/L)           | 1-SD increment    | 1.04   | 0.73-1.48   | 0.818   |
| Height (cm)              | 1-SD increment    | 1.01   | 0.96-1.06   | 0.834   |
| Weight (cm)              | 1-SD increment    | 1.07   | 1.04-1.11   | < 0.001 |
| BMI (kg/m <sup>2</sup> ) | 1-SD increment    | 1.23   | 1.13-1.33   | < 0.001 |
| WC (cm)                  | 1-SD increment    | 1.09   | 1.05-1.13   | < 0.001 |
| HC (cm)                  | 1-SD increment    | 1.09   | 1.05-1.14   | < 0.001 |
| WHR                      | 0.01-SD increment | 1.09   | 1.04-1.15   | < 0.001 |
| FM (kg)                  | 1-SD increment    | 1.16   | 1.09-1.22   | < 0.001 |
| LM (kg)                  | 1-SD increment    | 1.10   | 1.04-1.17   | 0.002   |
| PF (%)                   | 1-SD increment    | 1.23   | 1.13-1.34   | < 0.001 |
| Women                    |                   |        |             |         |
| Age (years)              | 1-SD increment    | 1.04   | 0.98-1.11   | 0.161   |
| Smoking (%)              | Yes vs no         | 20.306 | --          | 0.771   |

|                          |                   |       |            |         |
|--------------------------|-------------------|-------|------------|---------|
| Hypertension (%)         | Yes vs no         | 2.00  | 0.84-4.76  | 0.116   |
| DM family history (%)    | Yes vs no         | 0.57  | 0.17-1.88  | 0.353   |
| SBP (mm Hg)              | 1-SD increment    | 1.02  | 0.999-1.04 | 0.062   |
| DBP (mm Hg)              | 1-SD increment    | 1.03  | 0.99-1.07  | 0.111   |
| FPG (mmol/L)             | 1-SD increment    | 1.86  | 1.14-3.03  | 0.013   |
| TC (mmol/l)              | 1-SD increment    | 1.67  | 1.12-2.50  | 0.012   |
| TG (mmol/L)              | 1-SD increment    | 1.46  | 1.26-1.69  | < 0.001 |
| HDL-C (mmol/L)           | 1-SD increment    | 0.081 | 0.01-0.54  | 0.009   |
| LDL-C (mmol/L)           | 1-SD increment    | 1.05  | 0.67-1.65  | 0.824   |
| Height (cm)              | 1-SD increment    | 0.91  | 0.84-0.98  | 0.009   |
| Weight (cm)              | 1-SD increment    | 1.04  | 0.986-1.09 | 0.156   |
| BMI (kg/m <sup>2</sup> ) | 1-SD increment    | 1.27  | 1.10-1.46  | 0.001   |
| WC (cm)                  | 1-SD increment    | 1.11  | 1.06-1.17  | < 0.001 |
| HC (cm)                  | 1-SD increment    | 1.08  | 1.01-1.16  | 0.019   |
| WHR                      | 0.01-SD increment | 1.17  | 1.09-1.25  | < 0.001 |
| FM (kg)                  | 1-SD increment    | 1.11  | 1.02-1.21  | 0.013   |
| LM (kg)                  | 1-SD increment    | 0.99  | 0.89-1.12  | 0.912   |
| PF (%)                   | 1-SD increment    | 1.38  | 1.19-1.60  | < 0.001 |

BMI, body mass index; DBP, diastolic blood pressure; DM, diabetes mellitus; FPG, fasting plasma glucose; FM, fat mass; HC, hip circumference; HDL-C, high-density lipoprotein cholesterol; LDL-C, low-density lipoprotein cholesterol; LM, lean mass; SBP, systolic blood pressure; PF, percent fat; TC, total cholesterol; TG, triglyceride; WC, waist circumference; WHR, waist-hip ratio.

Table S4 Multivariable Cox regression models of commonly used obesity indicators for DM

|                      | Case (%)    | Multivariable hazards regression * |         |
|----------------------|-------------|------------------------------------|---------|
|                      |             | HR (95% CI)                        | p       |
| For men              |             |                                    |         |
| <b>BMI</b>           |             |                                    |         |
| per 1-SD increase    |             | 1.27 (1.16-1.380)                  | < 0.001 |
| T1 (reference)       | 9 (6.87%)   | 1                                  | -       |
| T2                   | 10 (7.75%)  | 1.09 (0.44-2.69)                   | 0.856   |
| T3                   | 29 (20.86%) | 3.90 (1.81-8.37)                   | < 0.001 |
| p for trend          |             |                                    | < 0.001 |
| <b>WC</b>            |             |                                    |         |
| per 1-SD increase    |             | 1.10 (1.07-1.14)                   | < 0.001 |
| T1 (reference)       | 5 (4.03%)   | 1                                  | -       |
| T2                   | 17 (12.78%) | 3.24 (1.19-8.78)                   | 0.021   |
| T3                   | 26 (18.31%) | 5.97 (2.27-15.71)                  | < 0.001 |
| p for trend          |             |                                    | < 0.001 |
| <b>HC</b>            |             |                                    |         |
| per 1-SD increase    |             | 1.11 (1.06-1.16)                   | < 0.001 |
| T1 (reference)       | 9 (7.03%)   | 1                                  | -       |
| T2                   | 11 (9.40%)  | 1.19 (0.49-2.88)                   | 0.701   |
| T3                   | 28 (18.18%) | 2.87 (1.35-6.08)                   | 0.006   |
| p for trend          |             |                                    | 0.004   |
| <b>WHR</b>           |             |                                    |         |
| per 0.01-SD increase |             | 1.09 (1.04-1.15)                   | < 0.001 |
| T1 (reference)       | 5 (3.82%)   | 1                                  | -       |

|                      |             |                   |         |
|----------------------|-------------|-------------------|---------|
| T2                   | 18 (13.85%) | 3.65 (1.35-9.83)  | 0.011   |
| T3                   | 25 (18.12%) | 5.42 (2.07-14.18) | 0.001   |
| p for trend          |             |                   | < 0.001 |
| Women                |             |                   |         |
| BMI                  |             |                   |         |
| per 1-SD increase    |             | 1.23 (1.07-1.42)  | 0.005   |
| T1 (reference)       | 4 (4.40%)   | 1                 | -       |
| T2                   | 8 (8.33%)   | 1.50 (0.44-5.07)  | 0.515   |
| T3                   | 14 (13.86%) | 1.64 (0.50-5.36)  | 0.413   |
| p for trend          |             |                   | 0.712   |
| WC                   |             |                   |         |
| per 1-SD increase    |             | 1.10 (1.04-1.16)  | 0.001   |
| T1 (reference)       | 4 (4.26%)   | 1                 | -       |
| T2                   | 4 (4.60%)   | 0.77 (0.18-3.18)  | 0.712   |
| T3                   | 18 (16.82%) | 2.54 (0.83-7.78)  | 0.104   |
| p for trend          |             |                   | 0.051   |
| HC                   |             |                   |         |
| per 1-SD increase    |             | 1.06 (0.99-1.14)  | 0.114   |
| T1 (reference)       | 4 (5.06%)   | 1                 | -       |
| T2                   | 8 (8.33%)   | 1.26 (0.37-4.33)  | 0.718   |
| T3                   | 14 (12.39%) | 1.52 (0.47-4.92)  | 0.481   |
| p for trend          |             |                   | 0.768   |
| WHR                  |             |                   |         |
| per 0.01-SD increase |             | 1.16 (1.07-1.25)  | < 0.001 |
| T1 (reference)       | 1 (1.06%)   | 1                 | -       |
| T2                   | 5 (5.21%)   | 4.54 (0.53-38.91) | 0.168   |

---

|             |             |                     |         |
|-------------|-------------|---------------------|---------|
| T3          | 20 (20.41%) | 15.91 (2.10-120.52) | 0.007   |
| p for trend |             |                     | < 0.001 |

---

\*, adjusted for hypertension (yes/no), DM family history (yes/no), smoking (yes/no), alcohol (yes/no), activity (yes/no), TG, TC, HDL-C, LDL-C, and FPG in men; DM family history (yes/no), smoking (yes/no), alcohol (yes/no), activity (yes/no), SBP, TG, TC, HDL-C, and FPG in women

BMI, body mass index; DM, diabetes mellitus; FPG, fasting plasma glucose; HC, hip circumference; HDL-C, high-density lipoprotein cholesterol; HR, hazard ratio; LDL-C, low-density lipoprotein cholesterol; SBP, systolic blood pressure; SD, standard deviation; T, tertile; TC, total cholesterol; TG, triglyceride; WC, waist circumference; WHR, waist-hip ratio



**Figure S1 Associations of three novel predicted body composition with risk of DM for men**

Restricted cubic splines were used to flexibly models and visualize the relations of different parameters with risk of DM. Hazard ratios are indicated by solid lines and 95% CIs by shaded areas. Reference points were the medians for FM (A; 13.61 kg), LM (B; 48.27 kg), and PF (C; 22.04%), respectively. The dotted line represents HR = 1. Confounders in Table 2 were adjusted.

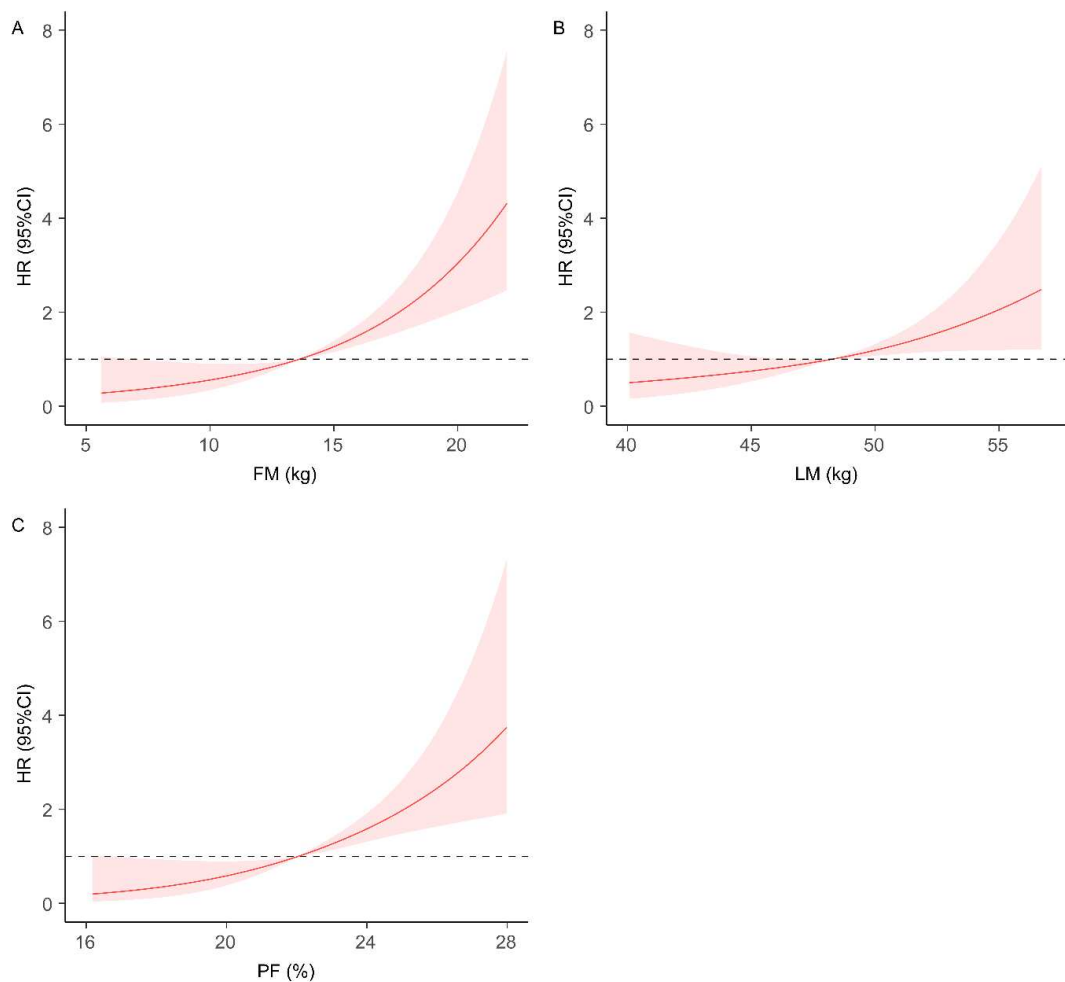

**Figure S2 Associations of three novel predicted body composition with risk of DM for women**

Restricted cubic splines were used to flexibly model and visualize the relations of different parameters with risk of DM. Hazard ratios are indicated by solid lines and 95% CIs by shaded areas. Reference points were the medians for FM (A; 19.45 kg), LM (B; 34.38 kg), and PF (C; 36.39%), respectively. The dotted line represents HR = 1. Confounders in Table 2 were adjusted.

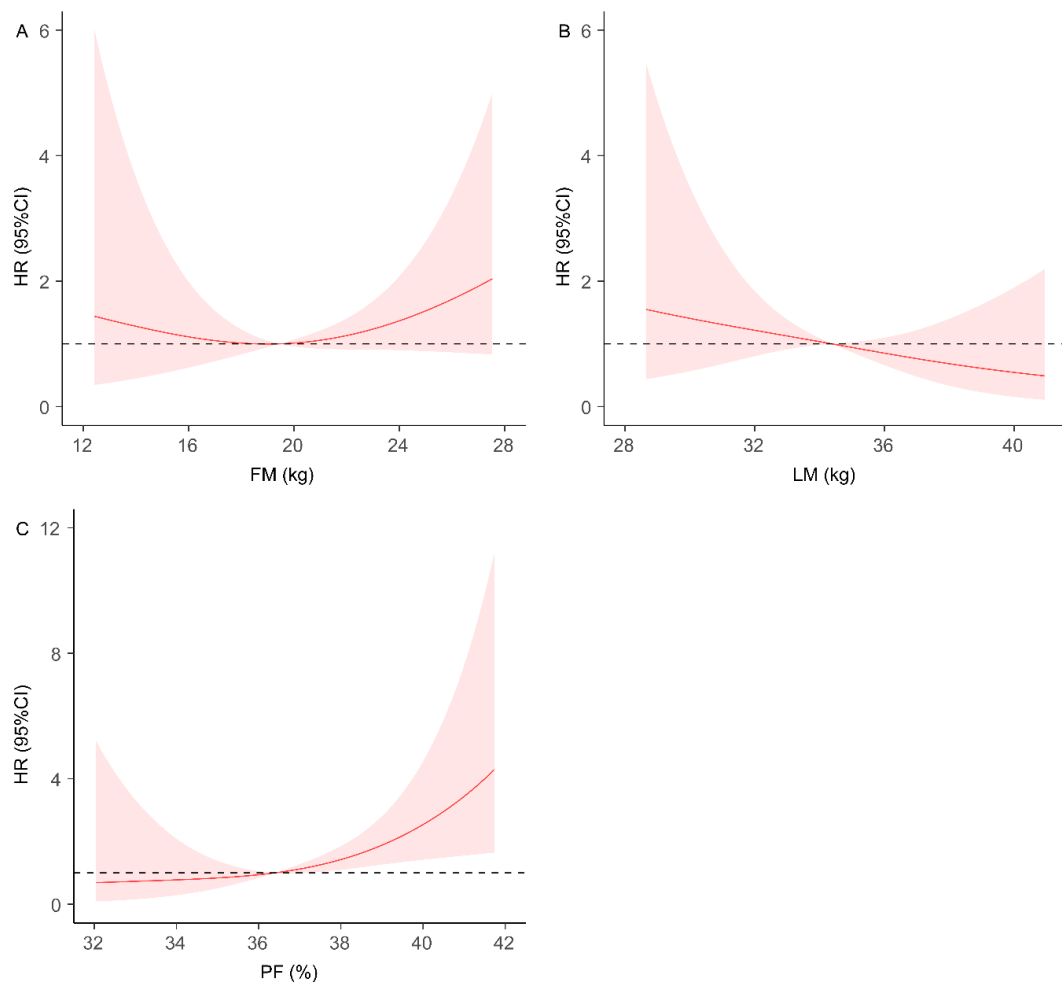

Supplement: bmjopen-2021-058162supp001_data_supplement.pdf [file bmjopen-2021-058162supp001_data_supplement.pdf]
